# Supplementary material for: Air-Sea interaction over the Gulf Stream in an ensemble of HighResMIP present climate simulations
Source: Springer Nature journal article supplement (doi:10.1007/s00382-020-05573-z), 2021-01-05
Supplement: MOESM1 [file 382_2020_5573_MOESM1_ESM.pdf]

**Supplemental Material for the article “Air-Sea interaction over the Gulf Stream in an ensemble of HighResMIP present climate simulations” by A. Bellucci et al.**

This supplementary information contains 4 figures as referenced in the main manuscript. These figures provide a comparison of lead-lag SST (and SST tendency)-THF correlation (Fig. SM1-2) and covariance patterns (Fig. SM3-4) for the MPI-ESM model hierarchy.

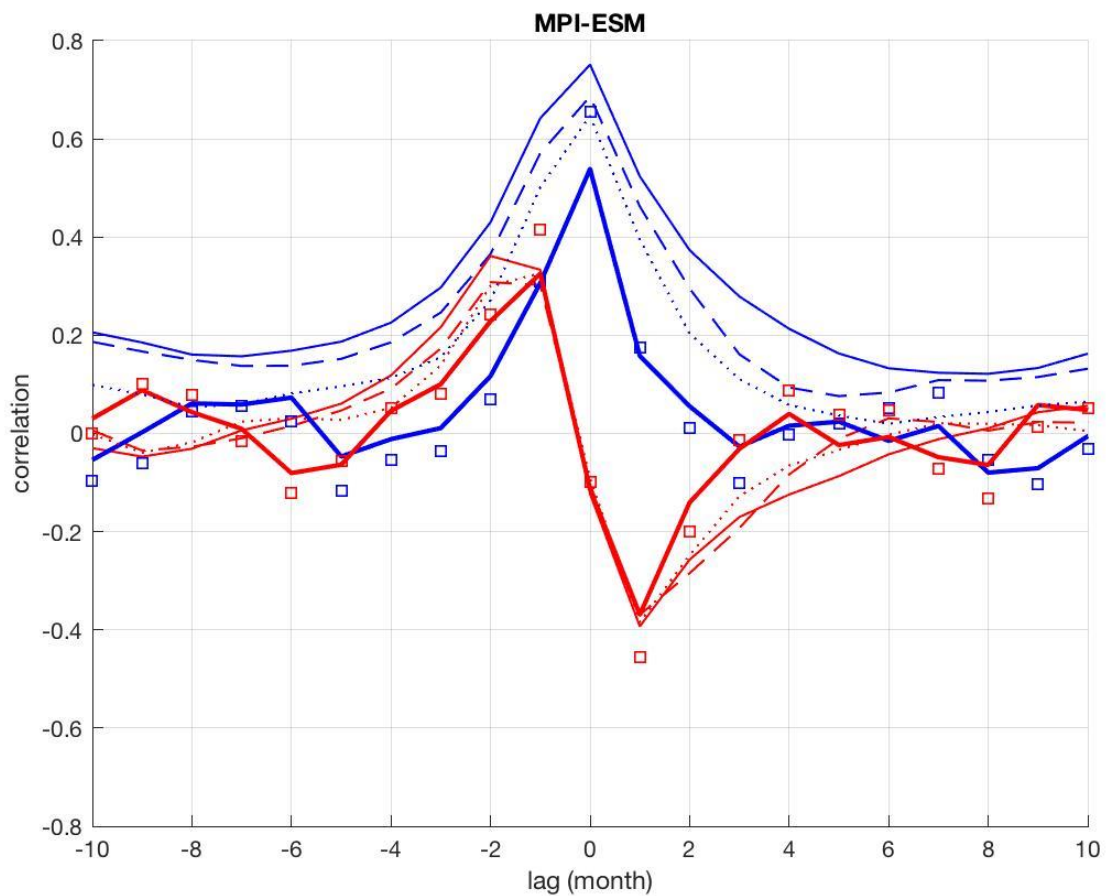

**Fig. SM1.** SST-THF (blue) and SST tendency-THF (red) correlation in the GS region, for HR (dashed), XR (solid thin) and ER (dotted) configurations of MPI-ESM models. SST/SST tendency leads (lags) THF for negative (positive) time-lags. Observational estimates based on J-OFURO3 dataset are also indicated with solid thick lines (1988-2013) and squares (2002-2013).

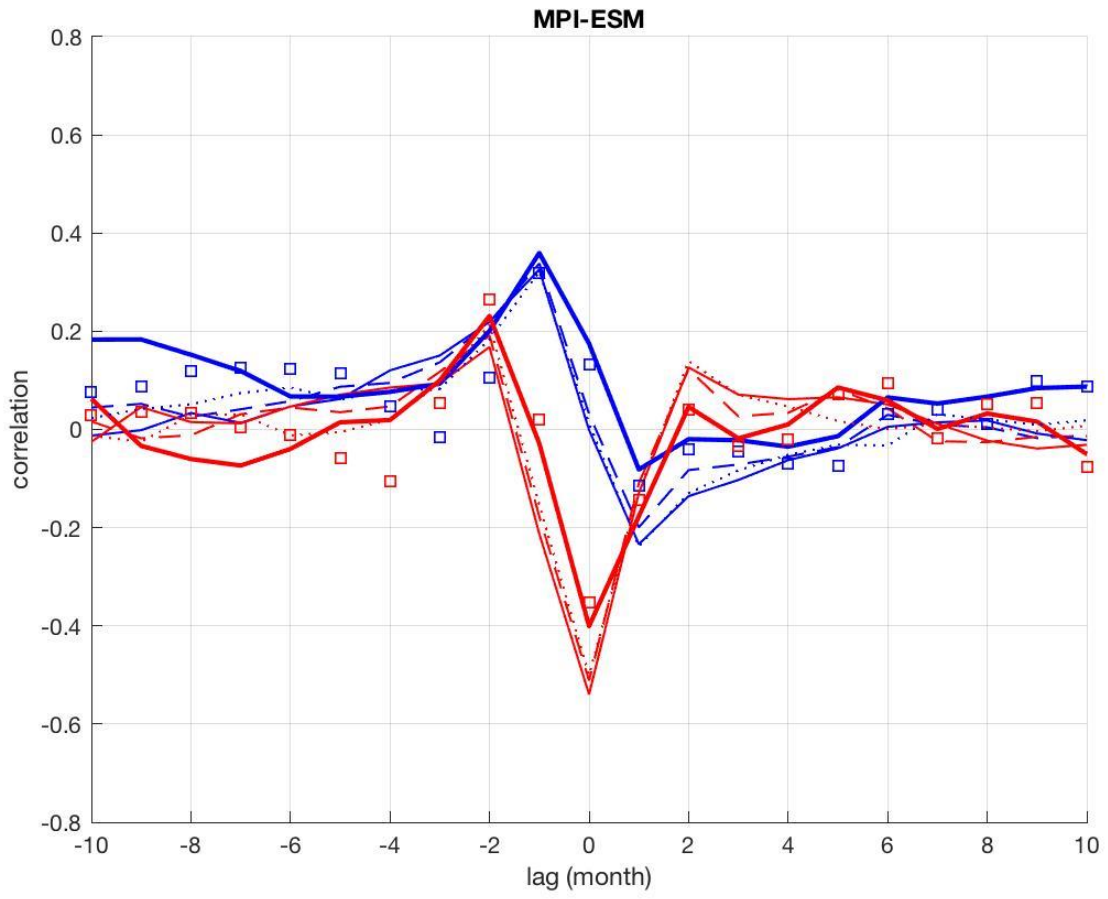

**Fig. SM2:** As Fig. SM1 but for the SG region.

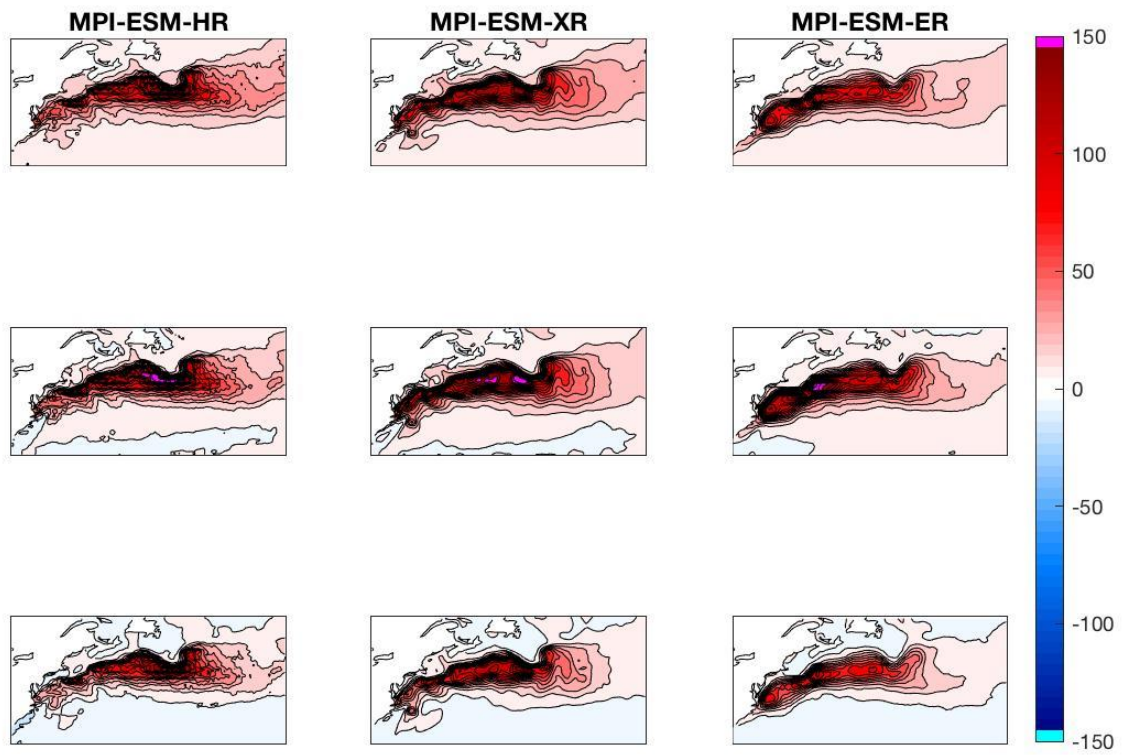

**Fig. SM3:** SST-THF covariance maps in the North Atlantic ( $^{\circ}\text{C W m}^{-2}$ ), computed for [-1, 0, +1]-month lag (top, mid, bottom row, respectively) for MPI-ESM models. SST leads THF for negative lags.

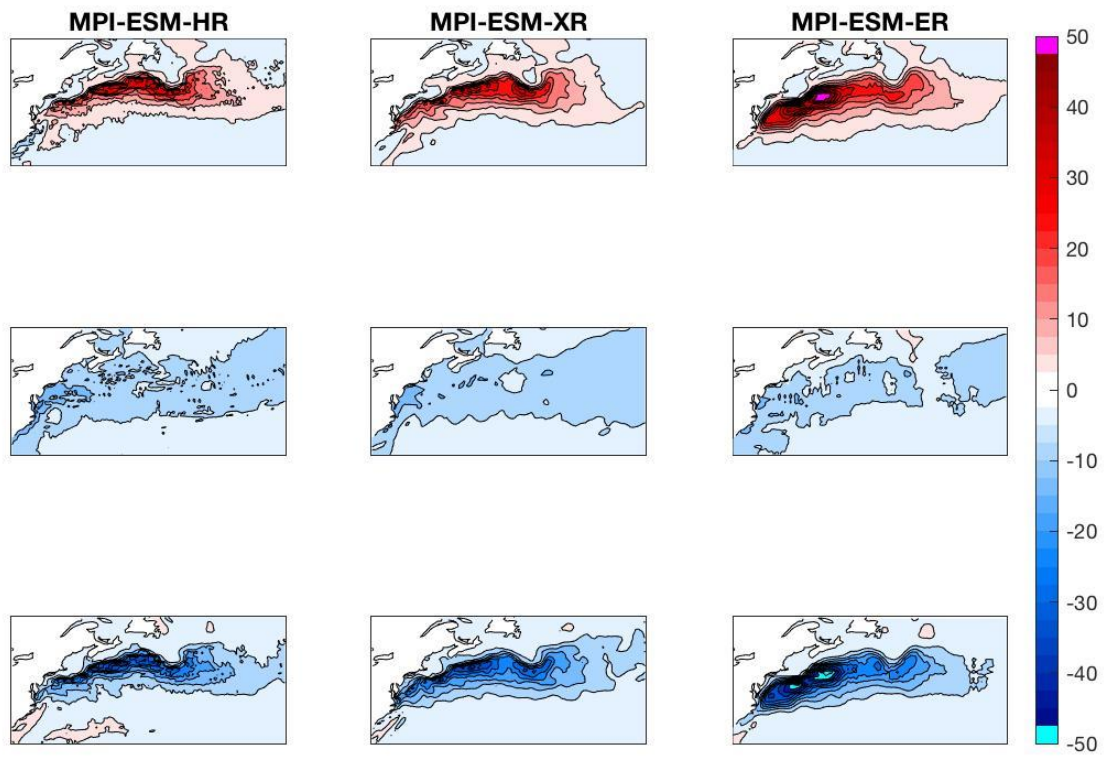

**Fig. SM4:** As Fig. SM3 but for SST tendency and THF ( $^{\circ}\text{C W m}^{-2} \text{ month}^{-1}$ ). SST tendency leads THF for negative lags.
